# Supplementary material for: The iron-manganese bimetal-MOF with double mimic enzyme: DFT verification and colorimetric detection of Cr(vi)
Source: Royal Society of Chemistry journal article supplement (doi:10.1039/d3nj01625k), 2023-01-01
Supplement: d3nj01625k2.pdf [file d3nj01625k2.pdf]

Supporting Information for

The Iron-manganese bimetal -MOF with double mimic enzyme:  
DFT verification and colorimetric detection of Cr (VI)

Dehong Bai<sup>1</sup>, Ziyu Xue<sup>1</sup>, Shaohui Li<sup>1</sup>, Ran Meng<sup>1</sup>, Dongxia Zhang<sup>1</sup>, Xibin Zhou<sup>1,\*</sup>

<sup>1</sup> Key Laboratory of Resource Environment and Sustainable Development of Oasis,  
College of Geography and Environment Science, Northwest Normal University,  
Lanzhou 730070, China

E-mail address of Corresponding author:

zhouxb@nwnu.edu.cn (Xibin Zhou).

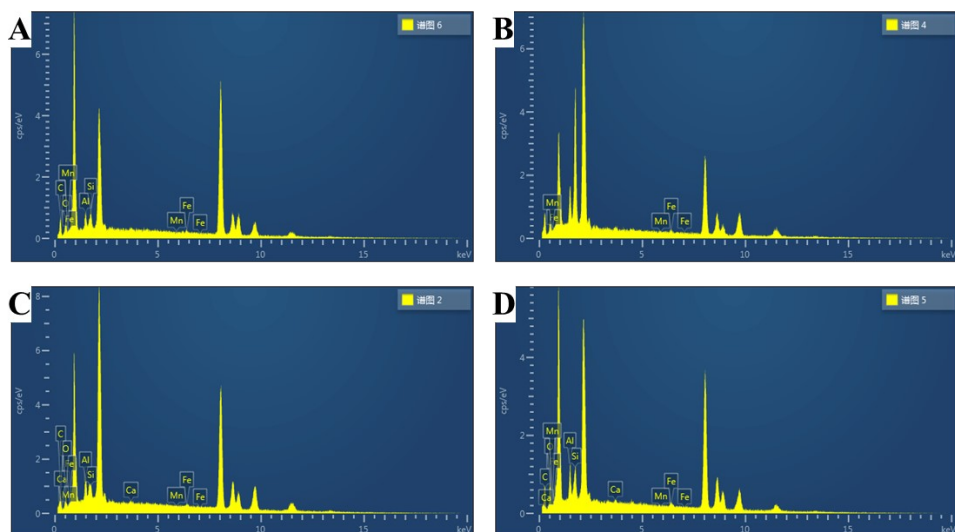

**Fig. S1** EDX pattern of (A) Fe<sub>3</sub>Mn<sub>1</sub>-MOF, (B) Fe<sub>2</sub>Mn<sub>1</sub>-MOF, (C) Fe<sub>1</sub>Mn<sub>1</sub>-MOF, (F) Fe<sub>1</sub>Mn<sub>2</sub>-MOF.

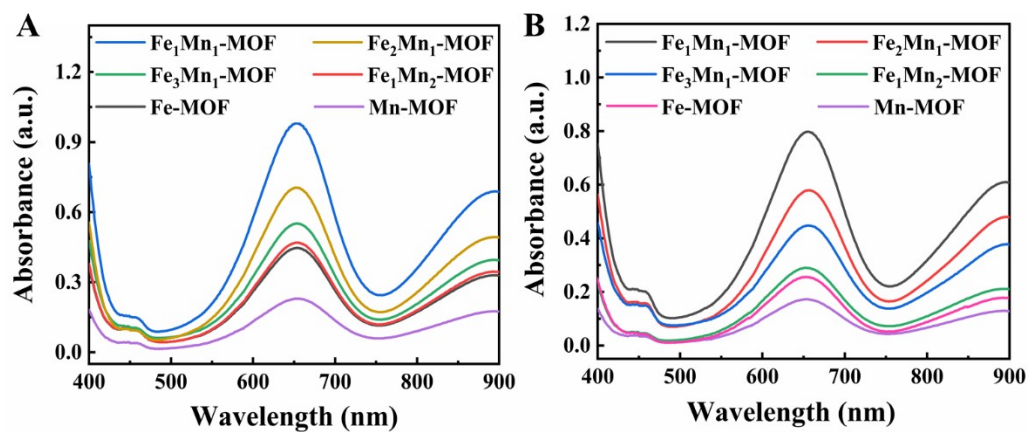

**Fig. S2** UV-vis absorption spectra of TMB catalyzed by different composite in system (A) TMB + H<sub>2</sub>O<sub>2</sub> + Fe<sub>x</sub>Mn<sub>y</sub>-MOF; (B) TMB + Fe<sub>x</sub>Mn<sub>y</sub>-MOF.

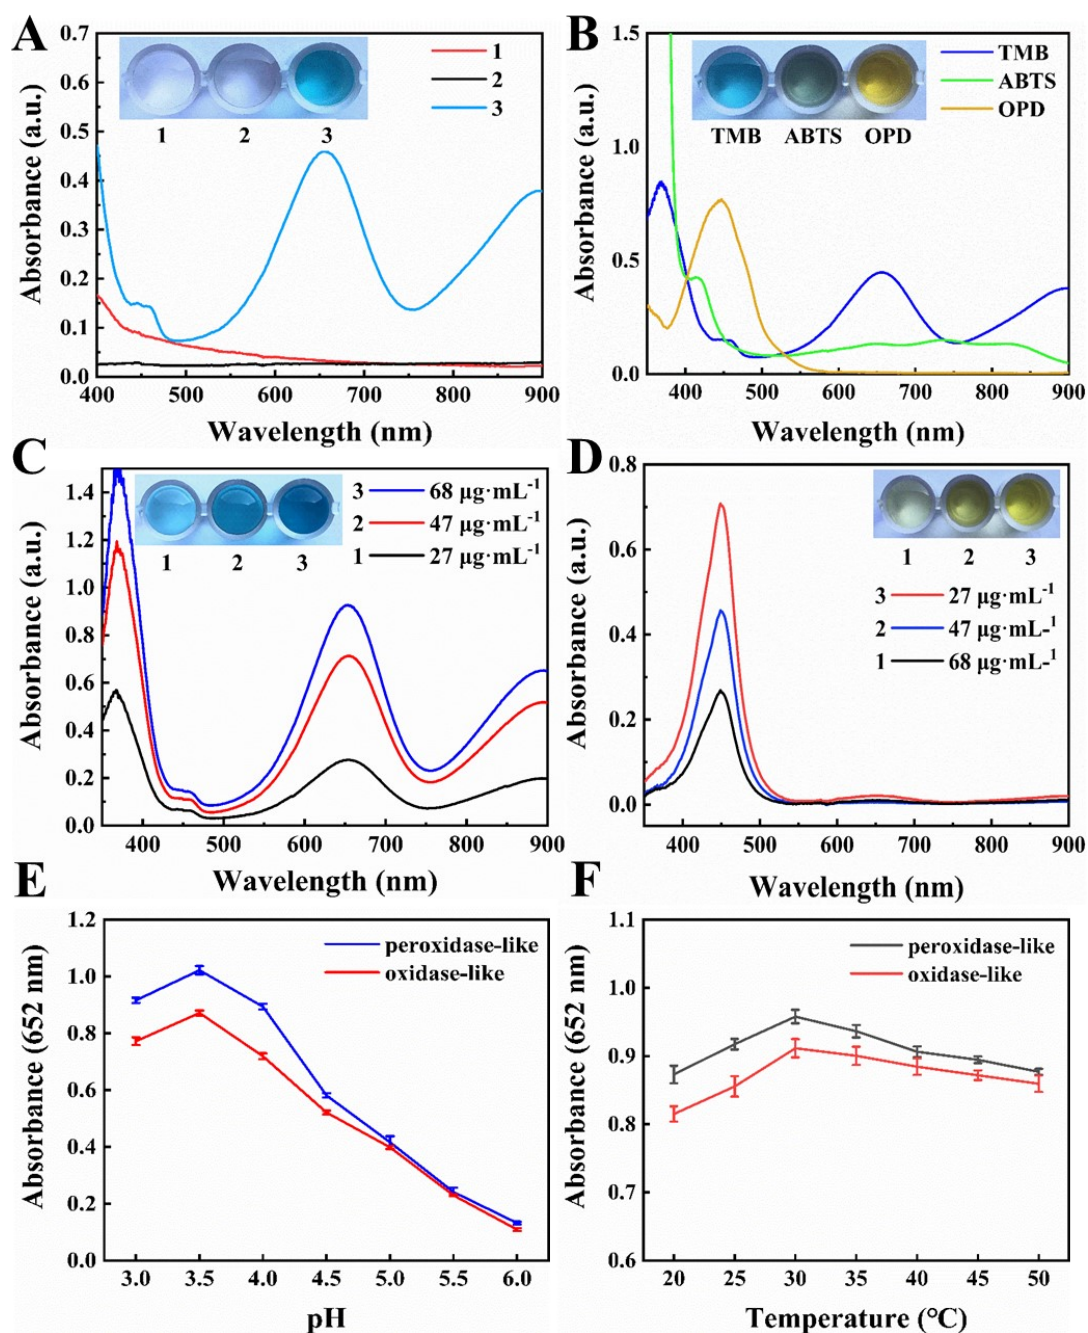

**Fig. S3** (A) UV-vis absorption spectra and color changes of TMB in different reaction systems: (1) Fe<sub>1</sub>Mn<sub>1</sub>-MOF, (2) TMB, (3) TMB + Fe<sub>1</sub>Mn<sub>1</sub>-MOF; (B) The oxidation of various substrates catalyzed by Fe<sub>1</sub>Mn<sub>1</sub>-MOF. (C) The UV-vis spectra of TMB catalyzed by different concentrations of Fe<sub>1</sub>Mn<sub>1</sub>-MOF; (D) UV-vis spectra of different concentrations of Fe<sub>1</sub>Mn<sub>1</sub>-MOF after adding sulfuric acid. The effects of (E) pH and (F) temperature on the mimic enzyme activity.

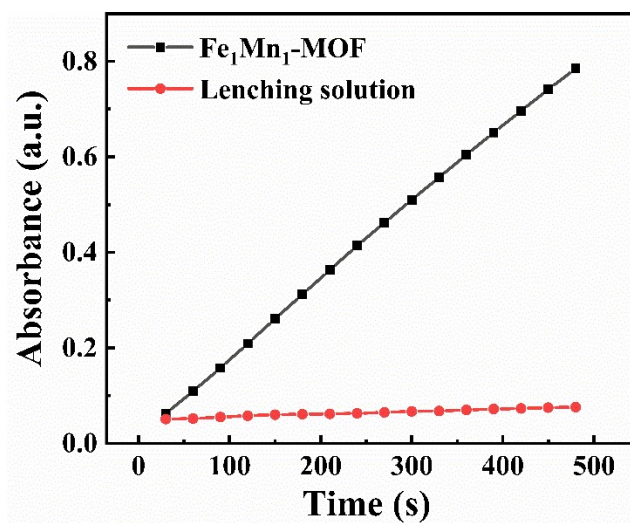

**Fig. S4** Absorbance at 652 nm of the TMBox system as a function of time in two solutions (black line: Fe<sub>1</sub>Mn<sub>1</sub>-MOF, red line: leaching solution).

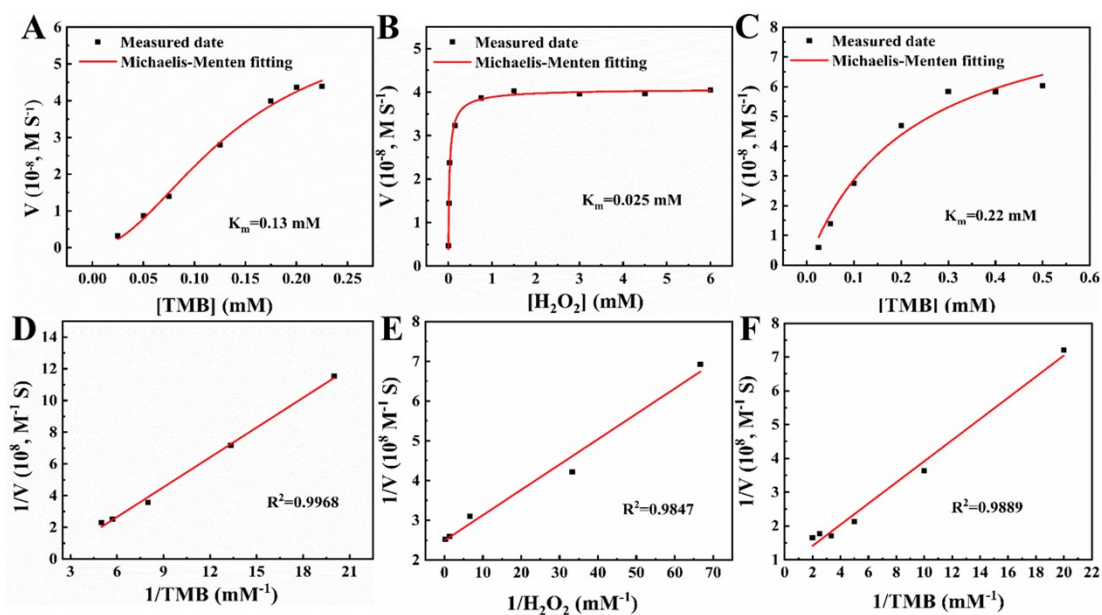

**Fig. S5** Steady-state kinetic analyses using the Michaelis–Menten curves (A, B and C) and the Lineweaver–Burk plots (D, E and F) for Fe<sub>1</sub>Mn<sub>1</sub>-MOF. (A and D) the TMB concentration was altered, (B and E) the H<sub>2</sub>O<sub>2</sub> concentration was altered, and (C and F) the concentration of TMB was altered without H<sub>2</sub>O<sub>2</sub>.

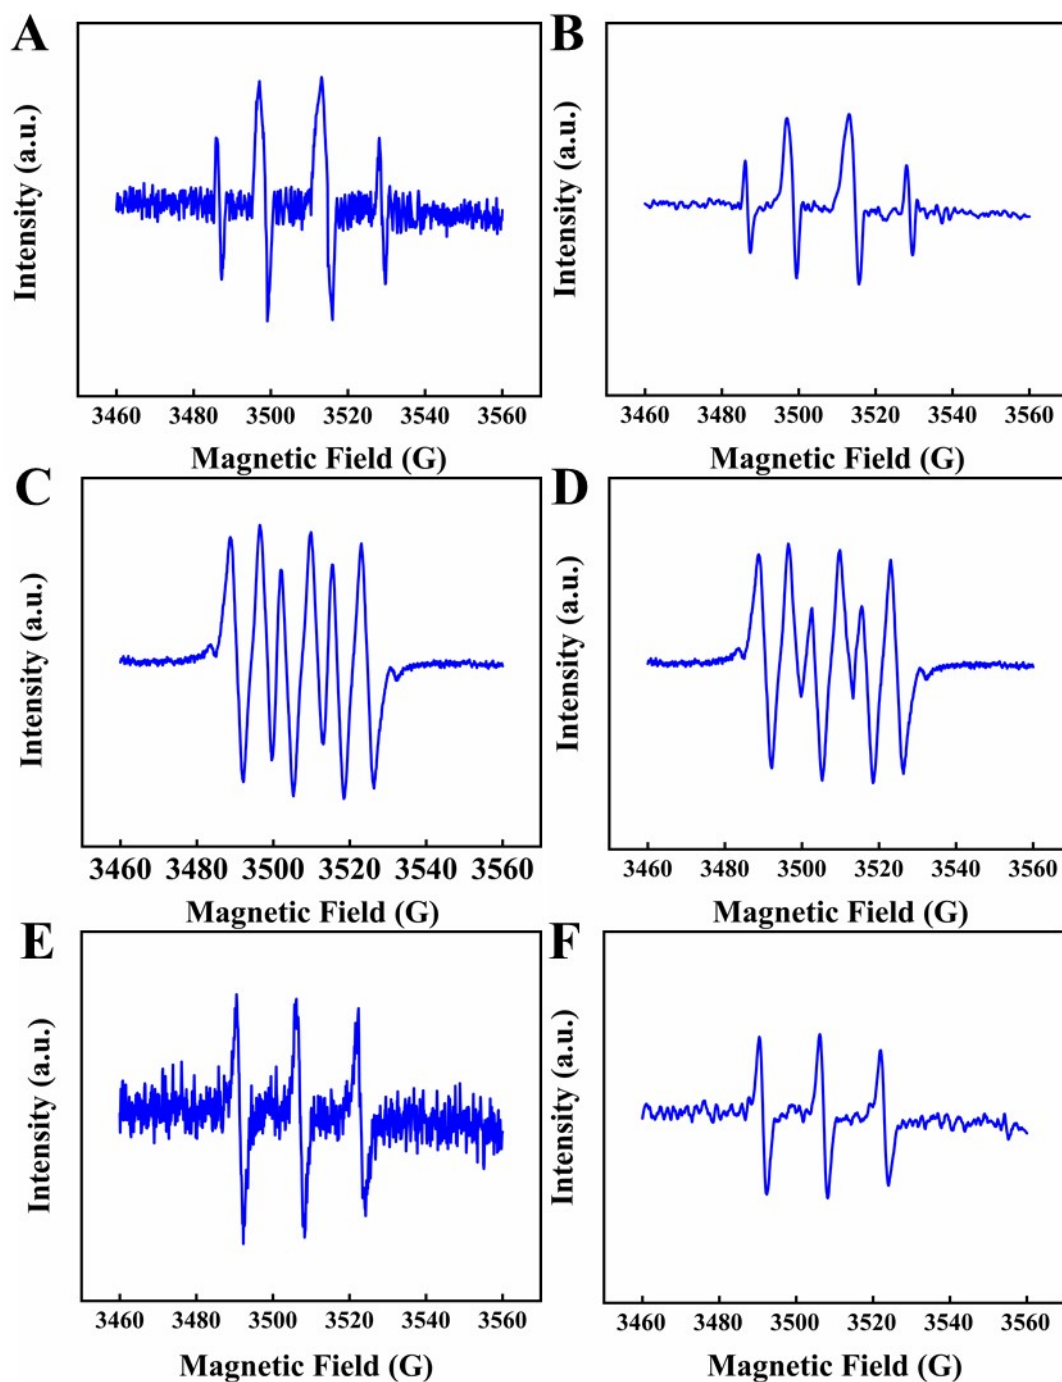

**Fig. S6** ESR spectra of  $\text{Fe}_1\text{Mn}_1\text{-MOF}+\text{H}_2\text{O}_2$  in (A)  $\text{H}_2\text{O}$  for  $\text{DMPO}\cdot\text{OH}$ , (C)  $\text{H}_2\text{O}$  for  $\text{DMPO}\cdot\text{O}_2^-$ , and (E)  $\text{H}_2\text{O}$  for  $\text{TEMP}\cdot^1\text{O}_2$ . ESR spectra of  $\text{Fe}_1\text{Mn}_1\text{-MOF}$  composite without  $\text{H}_2\text{O}_2$  for  $\text{DMPO}\cdot\text{OH}$ ,  $\text{DMPO}\cdot\text{O}_2^-$ , and  $\text{TEMP}\cdot^1\text{O}_2$  are shown in B, D, and F, respectively.

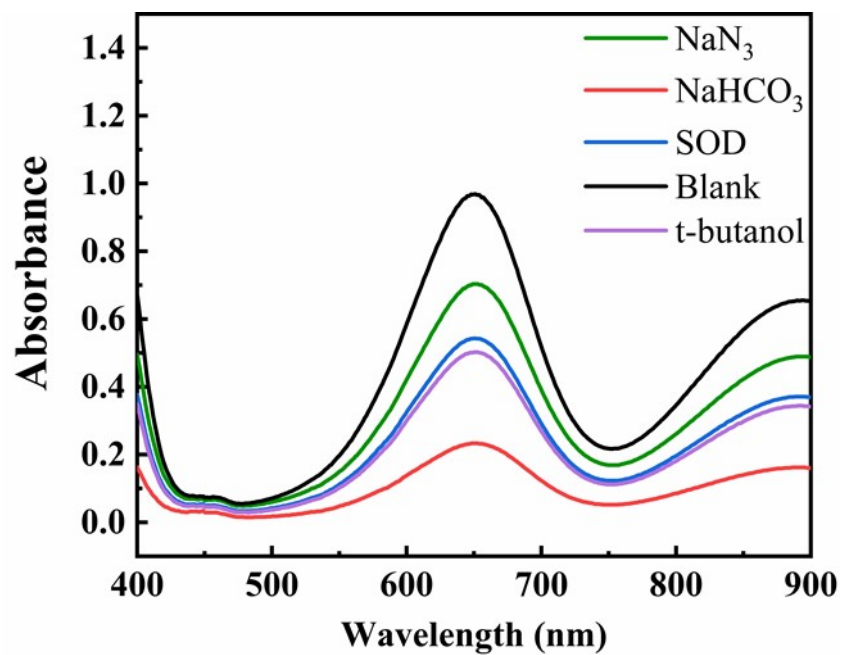

**Fig. S7** UV-vis spectra of different reactive oxygen species scavengers added to the system.

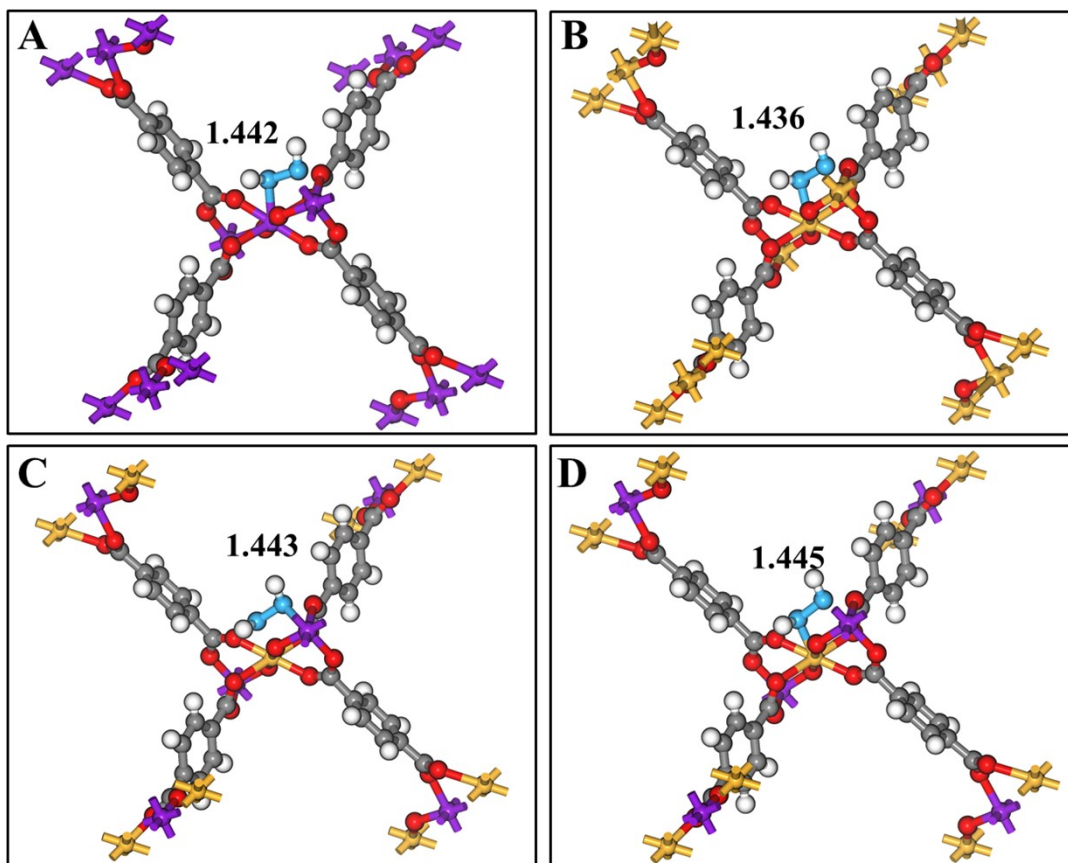

**Fig. S8** Configurations of adsorption of  $\text{H}_2\text{O}_2$  on different models: (A) Mn-MOF; (B) Fe-MOF; (C)  $\text{Fe}_1\text{-Mn}_1\text{-MOF}$  ( $\text{Mn}^*$ ); (D)  $\text{Fe}_1\text{-Mn}_1\text{-MOF}$  ( $\text{Fe}^*$ ).



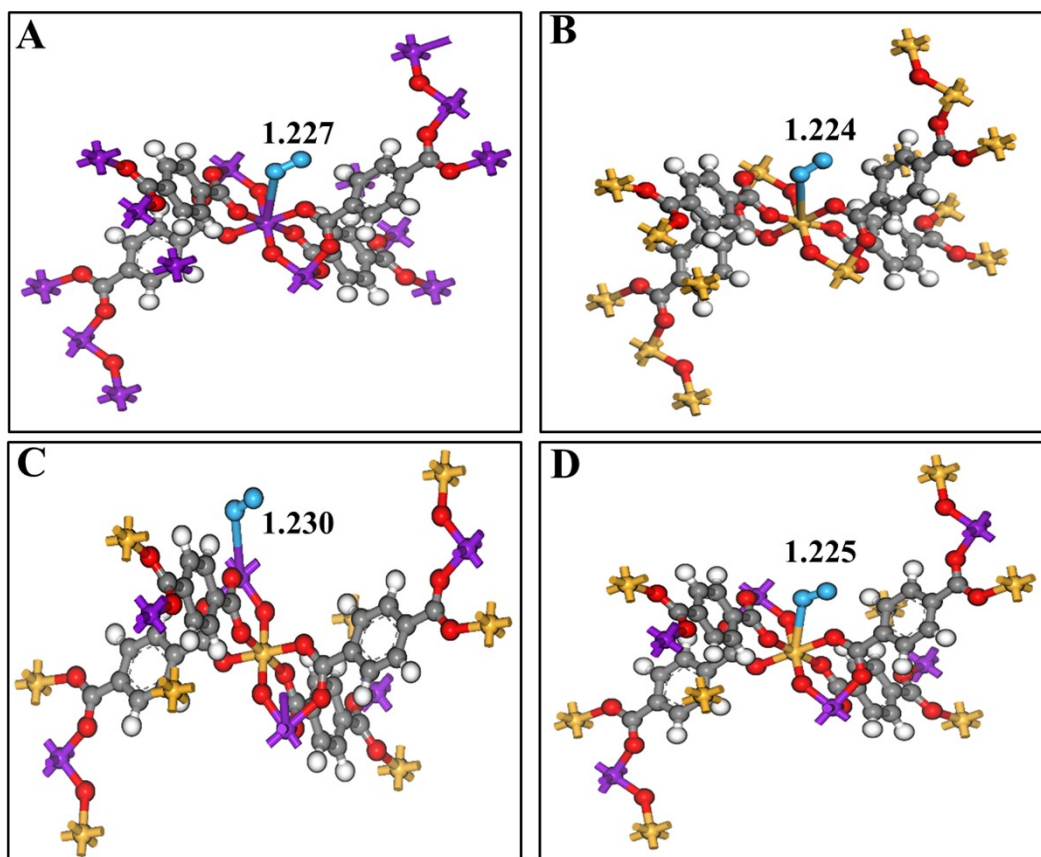

**Fig. S9** Configurations of adsorption of  $O_2$  on different models: (A) Mn-MOF; (B) Fe-MOF; (C)  $Fe_1-Mn_1$ -MOF ( $Mn^*$ ); (D)  $Fe_1-Mn_1$ -MOF ( $Fe^*$ ).

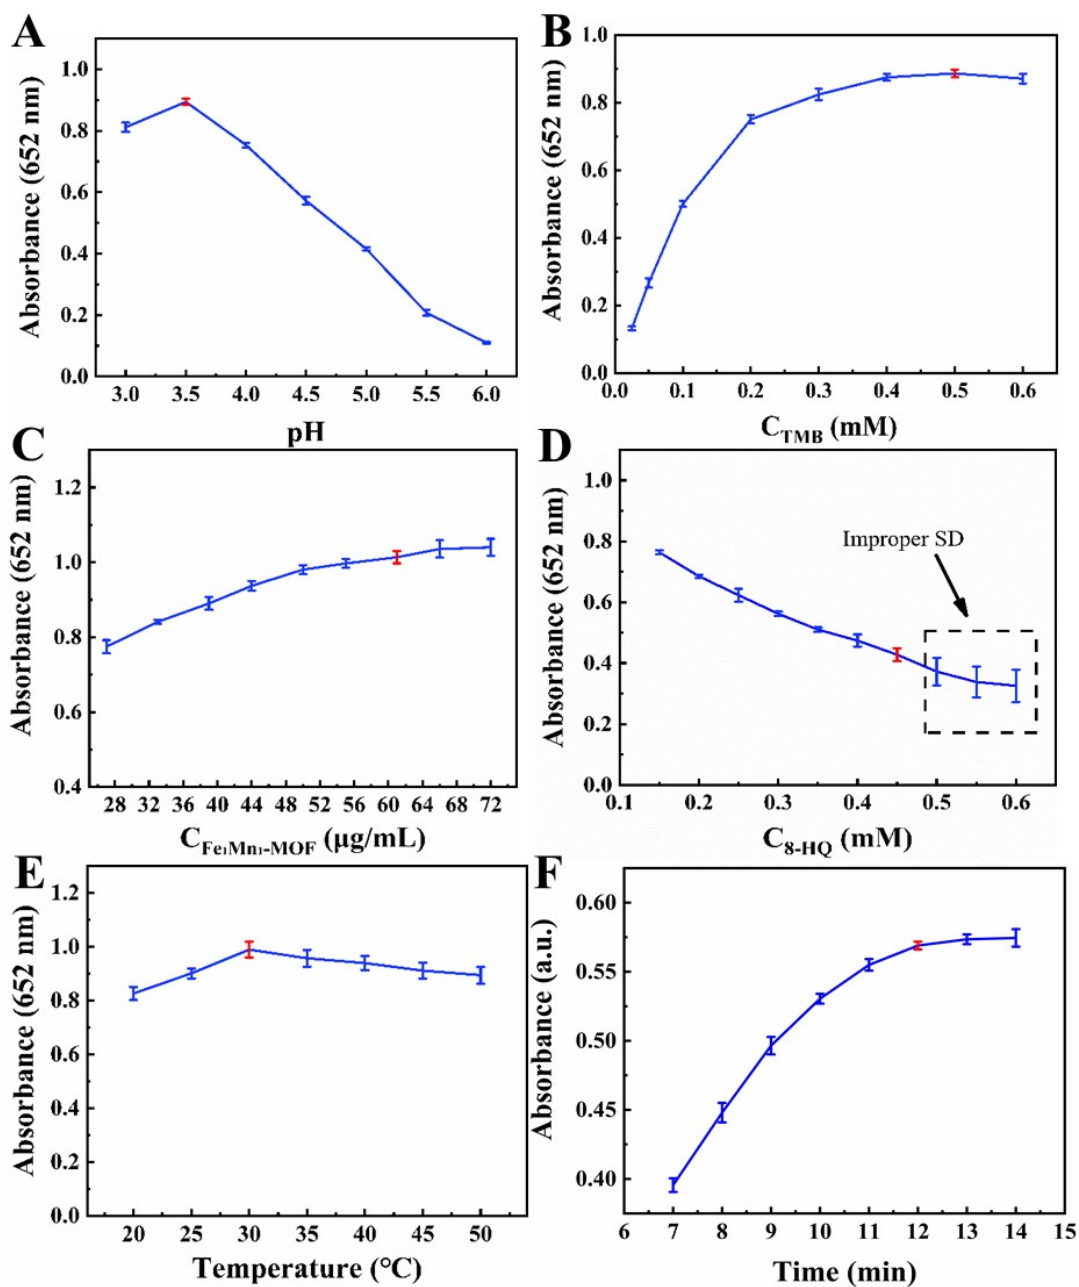

**Fig. S10** The influences of buffer solution pH (A); concentration of TMB (B); concentration of  $\text{Fe}_1\text{-Mn}_1\text{-MOF}$  (C); concentration of 8-HQ (D); Temperature (E); responsive time (F) on the system ( $\text{Fe}_1\text{-Mn}_1\text{-MOF}$ : 60  $\mu\text{g/mL}$ , TMB: 0.5 mM, 8-HQ: 0.45 mM, Cr (VI): 3000 nM).

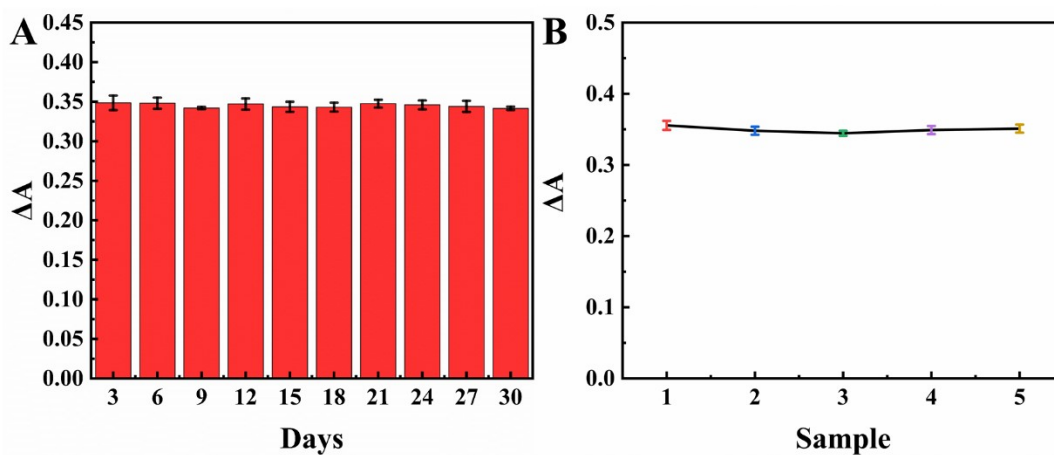

**Fig. S11** (A) Variation of catalytic activity of the Fe<sub>1</sub>Mn<sub>1</sub>-MOFs with time through 30 days; (B) The Absorbance difference ( $\Delta A$ ) at 652 nm of five sample solutions with the same Cr(VI) concentration.

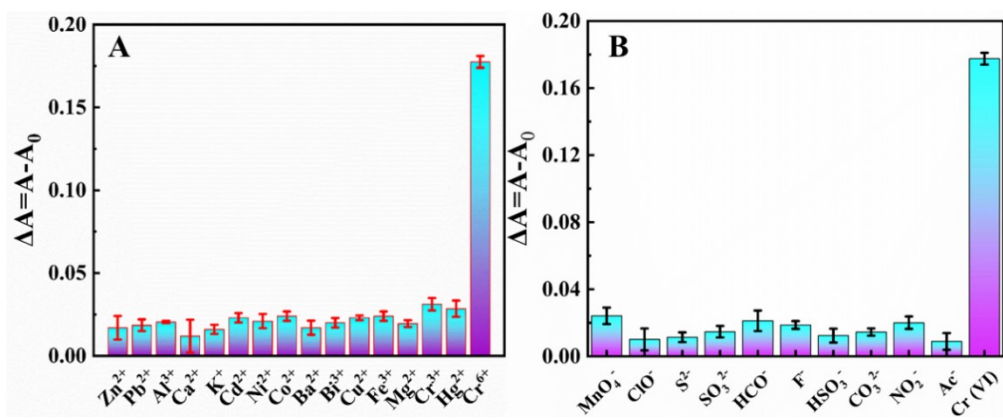

**Fig. S12** Anti-interference experiment for colorimetric detection of Cr(VI). (A) cation, (B) anion.

**Table. S1** Compared the apparent Michaelis-Menten constant ( $K_m$ ) and maximum reaction rate ( $V_{max}$ ) between the  $Fe_1Mn_1$ -MOF and other nanozyme.

| Catalyst          | Substrate | $K_m$ (mM) | $V_{max}$ ( $\times 10^{-8}$ , M/s) | Ref       |
|-------------------|-----------|------------|-------------------------------------|-----------|
| HRP               | TMB       | 0.434      | 10.00                               | [1]       |
|                   | $H_2O_2$  | 3.70       | 0.871                               |           |
| Glycine-MIL53(Fe) | TMB       | 0.11       | 2.28                                | [2]       |
|                   | $H_2O_2$  | 0.10       | 2.25                                |           |
| MOF(Co/2Fe)       | TMB       | 0.25       | 3.78                                | [3]       |
|                   | $H_2O_2$  | 4.22       | 4.91                                |           |
| $Fe_2Ni$ -MOF     | TMB       | 0.557      | 3.039                               | [4]       |
|                   | $H_2O_2$  | 0.134      | 1.35                                |           |
| $Fe_1Mn_1$ -MOF   | TMB       | 0.13       | 6.34                                | This work |
|                   | $H_2O_2$  | 0.025      | 3.99                                |           |

**Table. S2** The Michaelis-Menten constant ( $K_m$ ) and maximum reaction rate ( $V_{max}$ ) of the  $Fe_1Mn_1$ -MOF with TMB as the substrate.

| Catalyst        | Substrate | $K_m$ (mM) | $V_{max}$ ( $\times 10^{-8}$ , M/s) | Ref       |
|-----------------|-----------|------------|-------------------------------------|-----------|
| PCN-224-Mn      | TMB       | 0.243      | 13.725                              | [5]       |
| MOF(Co/2Fe)     | TMB       | 0.20       | 0.39                                | [3]       |
| Co/Mn-MOFs      | TMB       | 0.27       | 16.4                                | [6]       |
| $Fe_1Mn_1$ -MOF | TMB       | 0.22       | 9.23                                | This work |

**Table. S3** It was compared with other methods for detecting Cr (VI) in water samples.

| <b>Material</b>                      | <b>Method</b>   | <b>Linear range</b>                    | <b>LOD</b>    | <b>Ref</b> |
|--------------------------------------|-----------------|----------------------------------------|---------------|------------|
| MOF-199 (Cu)                         | Colorimetric    | 100-30000 nM                           | 20 nM         | [7]        |
| GO                                   | Colorimetric    | 70-430 nM                              | 6 nM          | [8]        |
| Zn (II)-MOF                          | Fluorescence    | /                                      | 6.91 $\mu$ M  | [9]        |
| Co-CDs                               | Fluorescence    | 5-125 $\mu$ M                          | 1.17 $\mu$ M  | [10]       |
| BSA-Au NP                            | Colorimetric    | 0.5-5- $\mu$ M                         | 280 nM        | [11]       |
| Siloxane-thiourea                    | Fluorescence    | 0-20 $\mu$ M                           | 63 nM         | [12]       |
| SnS/Bi <sub>2</sub> MoO <sub>6</sub> | Electrochemical | 0.5-310 $\mu$ M                        | 0.122 $\mu$ M | [13]       |
| PANI/Hep/MTA/<br>MGCE                | Electrochemical | 10 <sup>-4</sup> -10 <sup>-7</sup> ppm | 0.87 $\mu$ M  | [14]       |
| Fe <sub>1</sub> Mn <sub>1</sub> -MOF | Colorimetric    | 80-3500 nM                             | 51 nM         | This work  |

---

## References:

- [1] D. Bai, Z. Xue, P. Guo, M. Qiu, X. Lei, Y. Li, C. Ma, D. Zhang, X. Zhou, Ultrasensitive colorimetric detection of Hg<sup>2+</sup> based on Glutathione-modified Au nanoflowers, *Microchemical Journal* (2022).
- [2] W. Dong, L. Yang, Y. Huang, Glycine post-synthetic modification of MIL-53(Fe) metal-organic framework with enhanced and stable peroxidase-like activity for sensitive glucose biosensing, *Talanta* 167 (2017) 359-366.
- [3] H. Yang, R. Yang, P. Zhang, Y. Qin, T. Chen, F. Ye, A bimetallic (Co/2Fe) metal-organic framework with oxidase and peroxidase mimicking activity for colorimetric detection of hydrogen peroxide, *Microchimica Acta* 184(12) (2017) 4629-4635.
- [4] Z. Mu, S. Wu, J. Guo, M. Zhao, Y. Wang, Dual Mechanism Enhanced Peroxidase-like Activity of Iron–Nickel Bimetal–Organic Framework Nanozyme and Its Application for Biosensing, *ACS Sustainable Chemistry & Engineering* 10(9) (2022) 2984-2993.
- [5] X. Lai, Y. Shen, S. Gao, Y. Chen, Y. Cui, D. Ning, X. Ji, Z. Liu, L. Wang, The Mn-modified porphyrin metal-organic framework with enhanced oxidase-like activity for sensitively colorimetric detection of glutathione, *Biosens Bioelectron* 213 (2022) 114446.
- [6] X. Qi, Tian, H., Dang, X., Fan, Y., Zhang, Y., Zhao, H., *Anal. Methods.* (2019).
- [7] W. Shi, M. He, W. Li, X. Wei, B. Bui, M. Chen, W. Chen, Cu-Based Metal–Organic Framework Nanoparticles for Sensing Cr(VI) Ions, *ACS Applied Nano Materials* 4(1) (2021) 802-810.
- [8] N.N. Nghia, B.T. Huy, Y.I. Lee, Colorimetric detection of chromium(VI) using graphene oxide nanoparticles acting as a peroxidase mimetic catalyst and 8-hydroxyquinoline as an inhibitor, *Mikrochim Acta* 186(1) (2018) 36.
- [9] H. Jin, J. Xu, L. Zhang, B. Ma, X. Shi, Y. Fan, L. Wang, Multi-responsive luminescent sensor based on Zn (II) metal-organic framework for selective sensing of Cr(III), Cr(VI) ions and p-nitrotoluene, *Journal of Solid State Chemistry* 268 (2018) 168-174.
- [10] H.Y. Zhang, Y. Wang, S. Xiao, H. Wang, J.H. Wang, L. Feng, Rapid detection of Cr(VI) ions based on cobalt(II)-doped carbon dots, *Biosens Bioelectron* 87 (2017) 46-52.
- [11] J.F. Guo, D.Q. Huo, M. Yang, C.J. Hou, J.J. Li, H.B. Fa, H.B. Luo, P. Yang, Colorimetric detection of Cr (VI) based on the leaching of gold nanoparticles using a paper-based sensor, *Talanta* 161 (2016) 819-825.

- 
- [12] X. Wang, Z. Gou, Y. Zuo, Thioureas Bridged Polysiloxanes for Ultrafast Detection of Cr<sup>6+</sup> and Applications, *Macromolecular Chemistry and Physics* 222(13) (2021).
- [13] Y. Wang, Y. Ma, Q. Zhao, L. Hou, Z. Han, Polyoxometalate-based crystalline catalytic materials for efficient electrochemical detection of Cr(VI), *Sensors and Actuators B: Chemical* 305 (2020) 127469.
- [14] D. Fang, T. Xu, L. Fang, H. Chen, Y. Huang, H. Zhang, Z. Miao, C. Mao, B. Chi, H. Xu, A blood compatible, high-efficient sensor for detection of Cr(VI) in whole blood, *Sensors and Actuators B: Chemical* 329 (2021).
