# Supplementary figures and images for: The iron-manganese bimetal-MOF with double mimic enzyme: DFT verification and colorimetric detection of Cr(vi)
Source: Royal Society of Chemistry journal article supplement (doi:10.1039/d3nj01625k), 2023-01-01

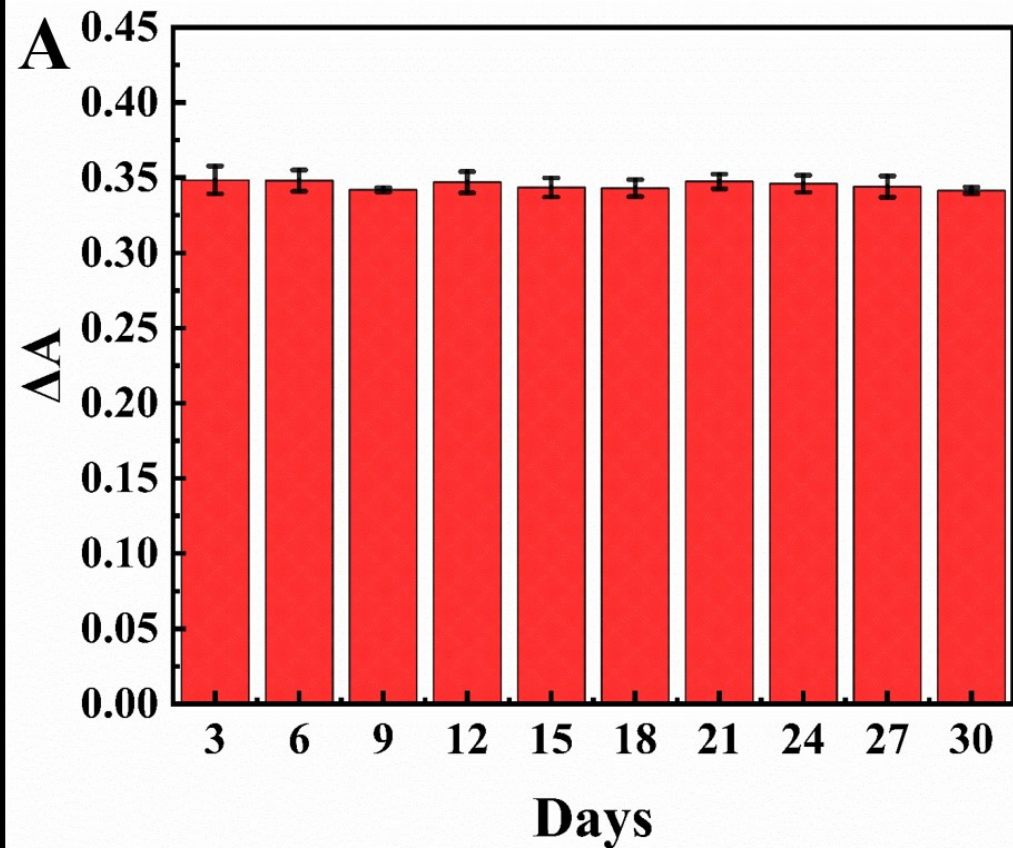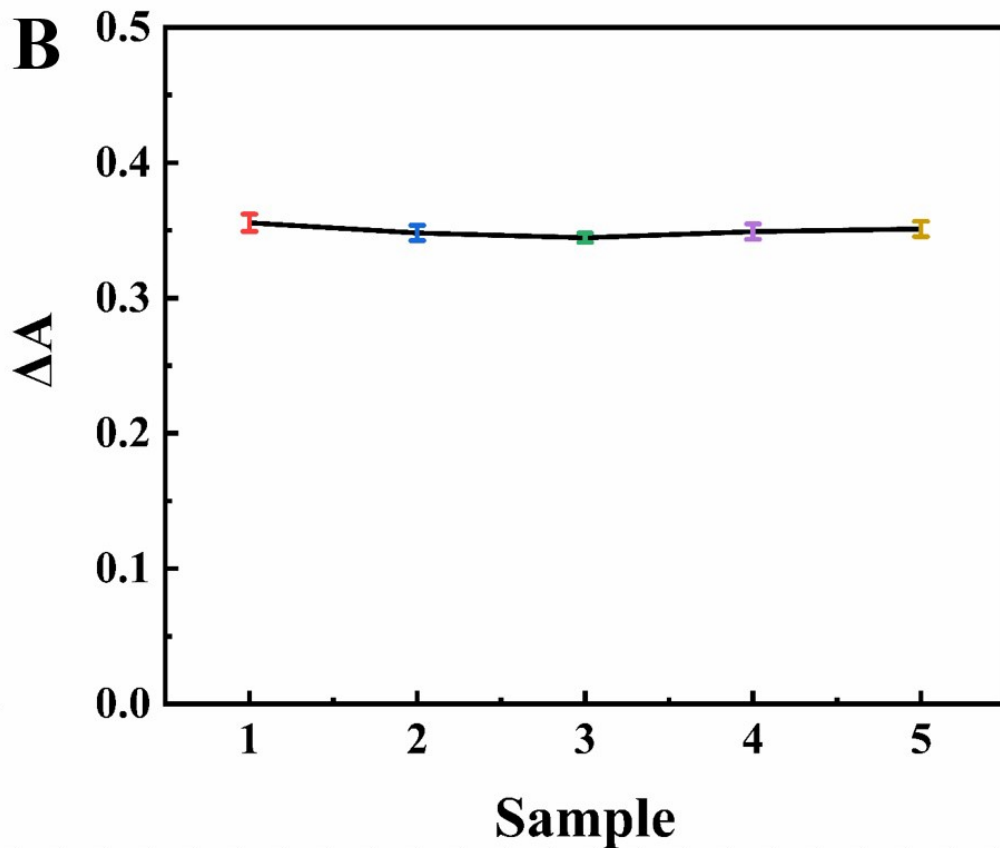

Supplement: d3nj01625k3.pdf [file d3nj01625k3.pdf]
